# Supplementary material for: Nitrogen-doped graphdiyne nanowall stabilized dendrite-free lithium metal anodes
Source: Royal Society of Chemistry journal article supplement (doi:10.1039/c9ta09551a), 2019-01-01
Supplement: c9ta09551a1.pdf [file c9ta09551a1.pdf]

## Supporting Information

### **Nitrogen-Doped Graphdiyne Nanowalls Stabilized Dendrite-Free Lithium Metal Anodes**

Tao Jiang<sup>a†</sup>, Ke Chen<sup>b†\*</sup>, Jingjing Wang<sup>c†</sup>, Zhongli Hu<sup>a</sup>, Gulian Wang<sup>a</sup>, Xu-Dong Chen<sup>c\*</sup>, Pengfei Sun<sup>a</sup>, Qiaobao Zhang<sup>d</sup>, Chenglin Yan and Li Zhang<sup>a\*</sup>

*<sup>a</sup>College of Energy, Soochow Institute for Energy and Materials Innovation, Key Laboratory of Advanced Carbon Materials and Wearable Energy Technologies of Jiangsu Province, Soochow University, Suzhou 215006, China. E-mail: zhangli81@suda.edu.cn*

*<sup>b</sup>Institute of Micro/Nano Photonic Materials and Applications, School of Physics and Electronics, Henan University, Kaifeng 475004, China. E-mail: kchen@henu.edu.cn*

*<sup>c</sup>Institute for New Energy Materials and Low Carbon Technologies, School of Materials Science and Engineering, Tianjin University of Technology, Tianjin 300384, China. E-mail: chenxd@email.tjut.edu.cn*

*<sup>d</sup>Department of Materials Science and Engineering, College of Materials, Xiamen University, Xiamen 361005, Fujian, China*

*<sup>†</sup>These authors contributed equally to this work.*

## ➤ Supporting Information Notes

### Supplementary note 1

**Electrochemistry:** The nucleation overpotential and Coulombic efficiency was performed on a LAND CT2001A battery testing system. For the Li plating/stripping cycling efficiency measurement, the batteries were first cycled in a potential range of 0-1 V at 50  $\mu\text{A}$  for five cycles to stabilize the SEI and remove surface contaminations. 1  $\text{mAh}\cdot\text{cm}^{-2}$  (or 3  $\text{mAh}\cdot\text{cm}^{-2}$ , 5  $\text{mAh}\cdot\text{cm}^{-2}$ ) of Li was then deposited onto the working electrodes (GDY and N-GDY) and charged to 0.5 V at various current densities from 1 to 5  $\text{mA}\cdot\text{cm}^{-2}$  for each cycle. The Coulombic efficiency was calculated based on the ratio of Li stripping to plating. Rate capability of N-GDY electrodes were measured at current densities ranging from 0.5 to 6  $\text{mA}\cdot\text{cm}^{-2}$  for 1 h in both the stripping/plating processes of each cycle. The long-term cycling stability and voltage hysteresis were investigated through a symmetric Li/Li test, GDY and N-GDY hosts were firstly plated by Li metal with a pre-stored capacity of 2  $\text{mAh}\cdot\text{cm}^{-2}$  (or 5  $\text{mAh}\cdot\text{cm}^{-2}$ , 8  $\text{mAh}\cdot\text{cm}^{-2}$ ), then cycled at various current densities with a constant areal capacity of 1  $\text{mAh}\cdot\text{cm}^{-2}$  (or 3  $\text{mAh}\cdot\text{cm}^{-2}$ , 5  $\text{mAh}\cdot\text{cm}^{-2}$ ). Electrochemical impedance spectroscopy (EIS) was measured after different electrochemical cycles by applying an alternating voltage of 5 mV over the frequency ranging from  $10^{-2}$  to  $10^5$  Hz.

Full cells were constructed with a  $\text{LiNi}_{0.5}\text{Co}_{0.2}\text{Mn}_{0.3}\text{O}_2$  (NCM) cathode and a N-GDY@Li anode with a pre-stored capacity of 5  $\text{mAh}\cdot\text{cm}^{-2}$  (or pure Li metal). The NCM electrodes were punched into circle discs of *ca.* 0.33  $\text{cm}^2$  and the areal mass loading of NCM was  $\sim 3$   $\text{mg}\cdot\text{cm}^{-2}$ . Cyclic voltammetry (CV) measurements were performed in a potential range of 2.8-4.3 V at a scan rate of 0.1  $\text{mV}\cdot\text{s}^{-1}$ . Galvanostatic charge-discharge cycling tests of N-GDY@Li||NCM and Li||NCM full cells were carried out in a potential range of 2.8-4.3 V at 0.2 C, corresponding to a current density of 0.096  $\text{mA}\cdot\text{cm}^{-2}$ .

## Supplementary note 2

**DFT simulations:** Density functional theory (DFT) simulations were performed using the Vienna Ab-initio Simulation Package (VASP) package. The generalized gradient approximation (GGA) with the Perdew-Burke-Ernzerhof (PBE) functional was employed to describe the electronic exchange and correlation effects. Uniform G-centered k-points meshes with a resolution of  $2\pi \cdot 0.03 \text{ \AA}^{-1}$  and Methfessel-Paxton electronic smearing were adopted for the integration in the Brillouin zone for geometric optimization. The simulation was run with a cutoff energy of 500 eV throughout the computations. These settings ensure convergence of the total energies to within 1 meV per atom. Structure relaxation proceeded until all forces on atoms are less than  $1 \text{ meV \AA}^{-1}$  and the total stress tensor is within 0.01 GPa of the target value. The adsorption energy ( $\Delta E_{\text{ads}}$ ) was estimated by the following formula:

$$\Delta E(\text{ads}) = [E(\text{surface}+n \cdot \text{Li}) - E(\text{surface}) - n \cdot E(\text{Li})] / n$$

where  $n$  is the number of adsorbed Li atoms,  $E(\text{surface}+n \cdot \text{Li})$  is the total energy of the surface adsorbed  $n$  Li atoms,  $E(\text{surface})$  is the total energy of the Cu (111) or carbon-based surfaces, and  $E(\text{Li})$  is the total energy of one Li atom.

➤ **Supporting Information Figures**

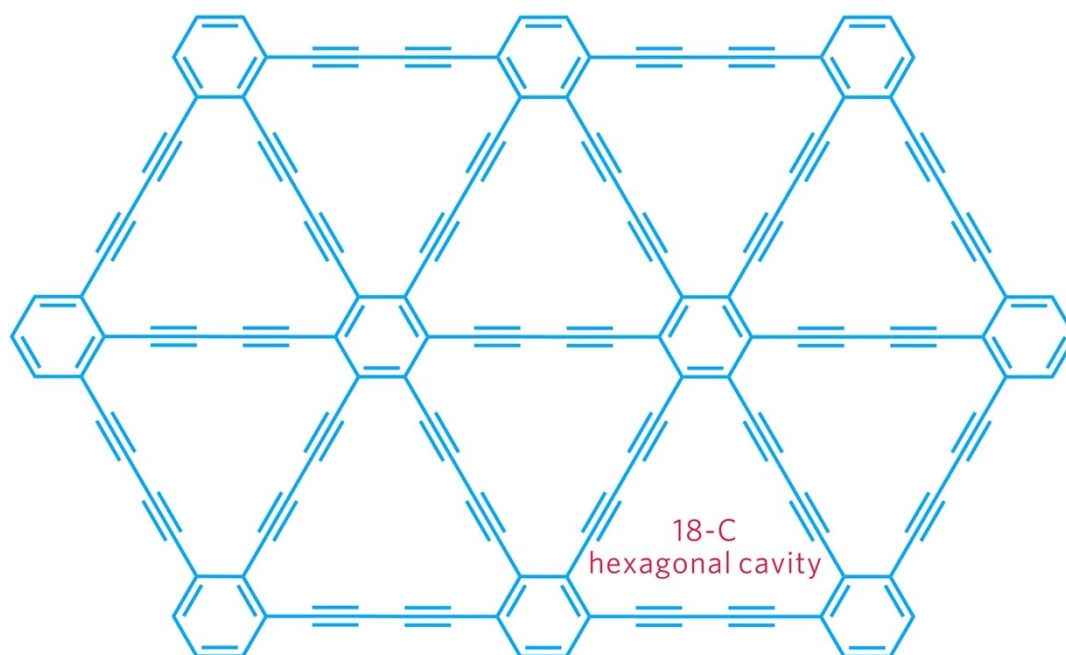

**Fig. S1. Schematic structure of a single-layer graphdiyne.**

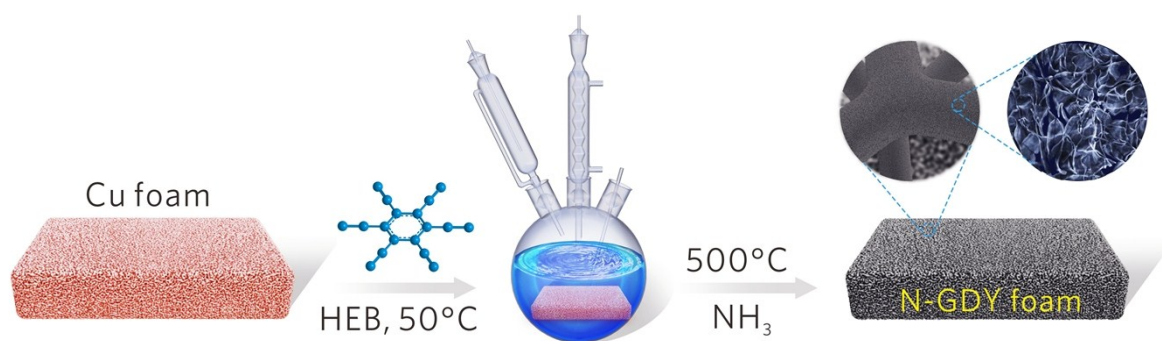

**Fig. S2. Schematic of the synthetic procedure of the N-GDY host.**

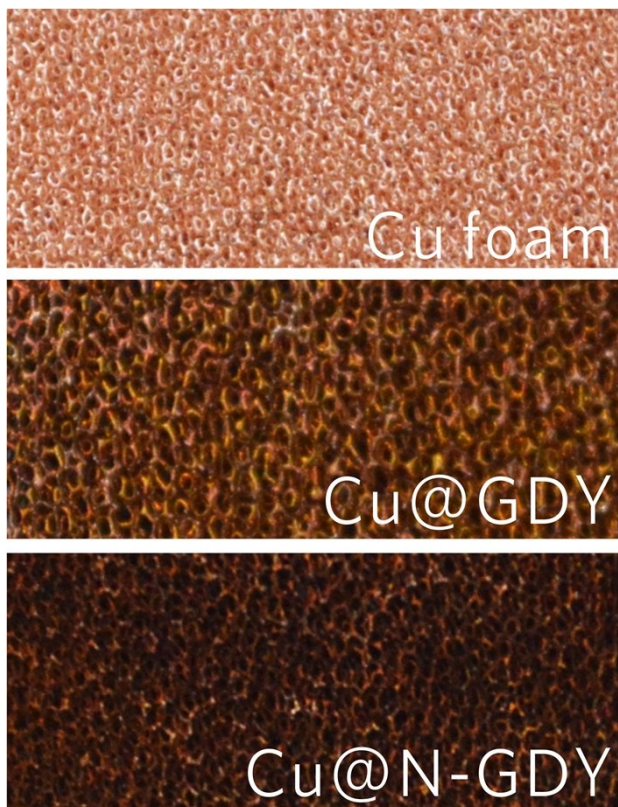

**Fig. S3.** Digital photographs of the pristine Cu foam, GDY host after the low-temperature wet-chemistry synthesis, and N-GDY host after the thermal nitridation process.

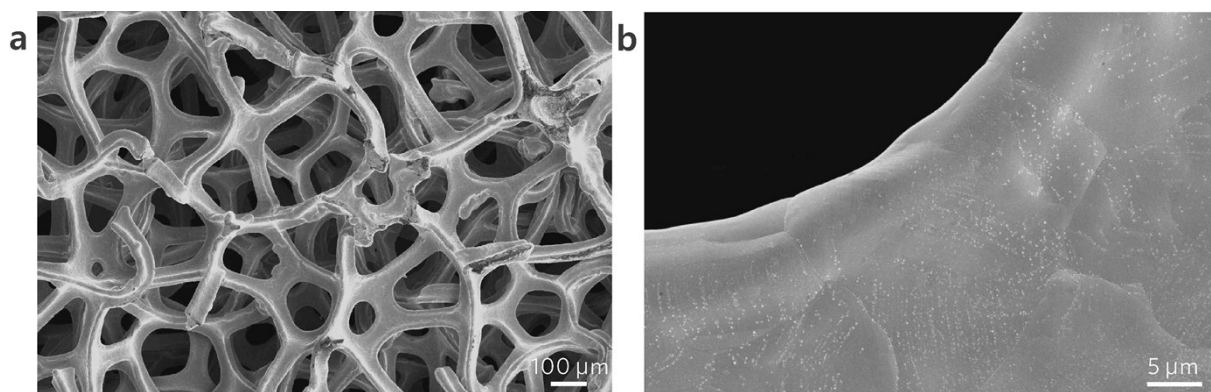

**Fig. S4.** SEM images of the pristine Cu foam at different magnifications.

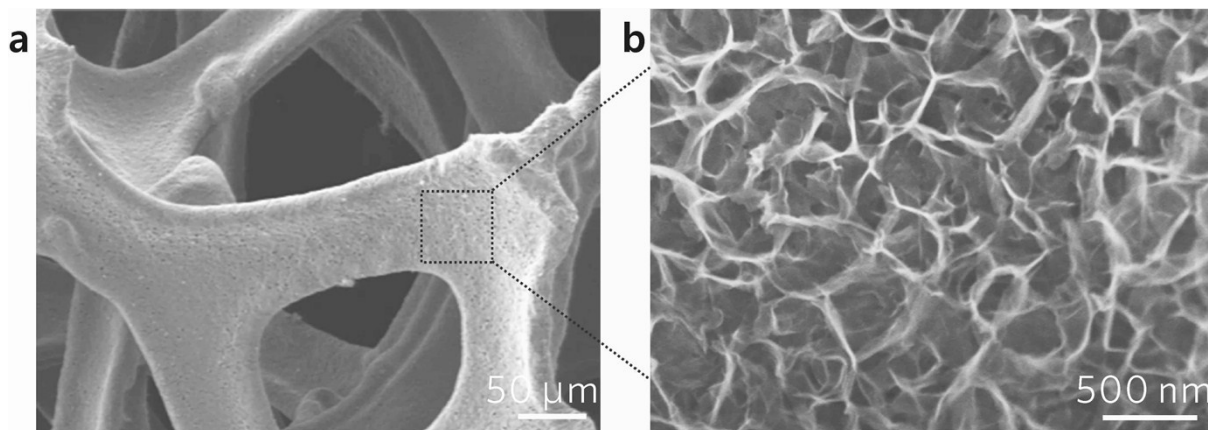

**Fig. S5. SEM images of the as-obtained GDY foam at different magnifications.**

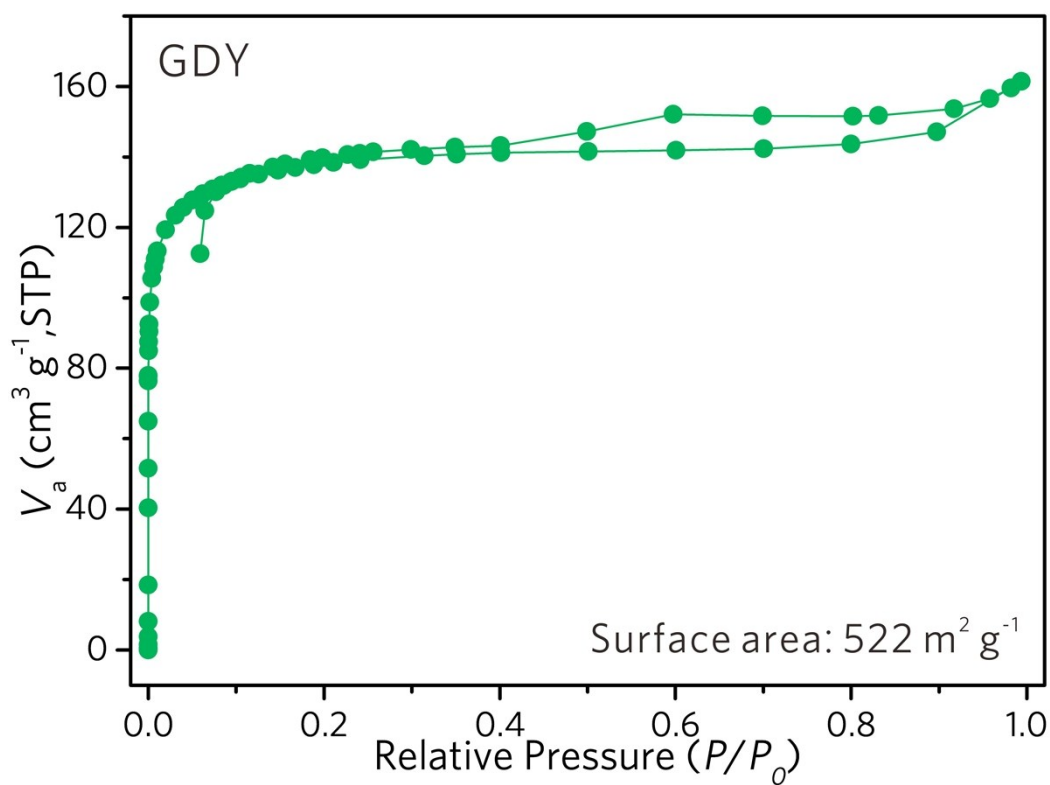

**Fig. S6. N<sub>2</sub> adsorption-desorption profiles of N-GDY powders that are stripped from the 3D Cu foam.**

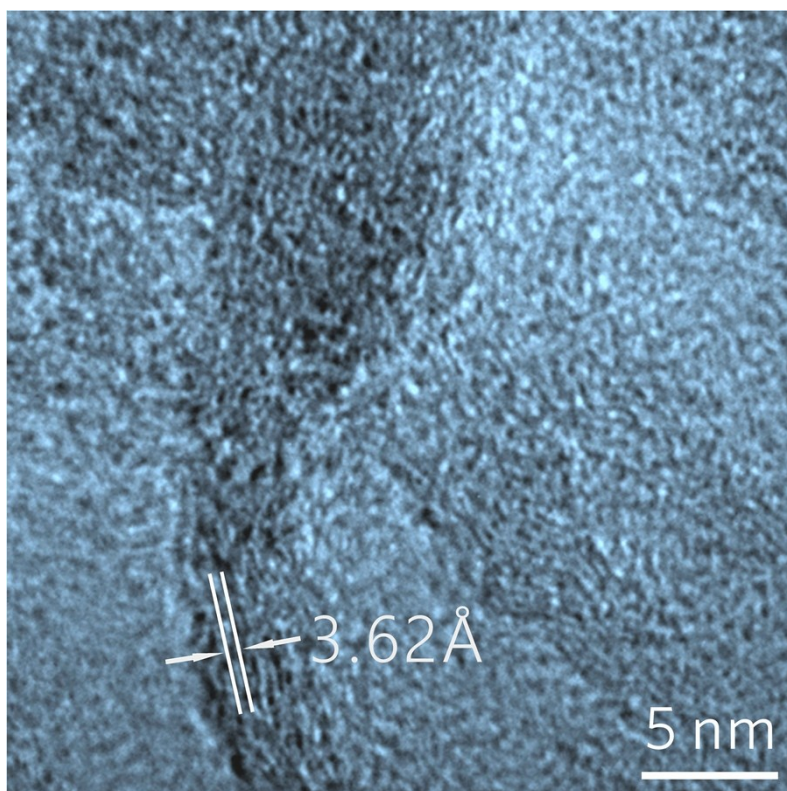

Fig. S7. HRTEM image of the as-obtained N-GDY nanowalls.

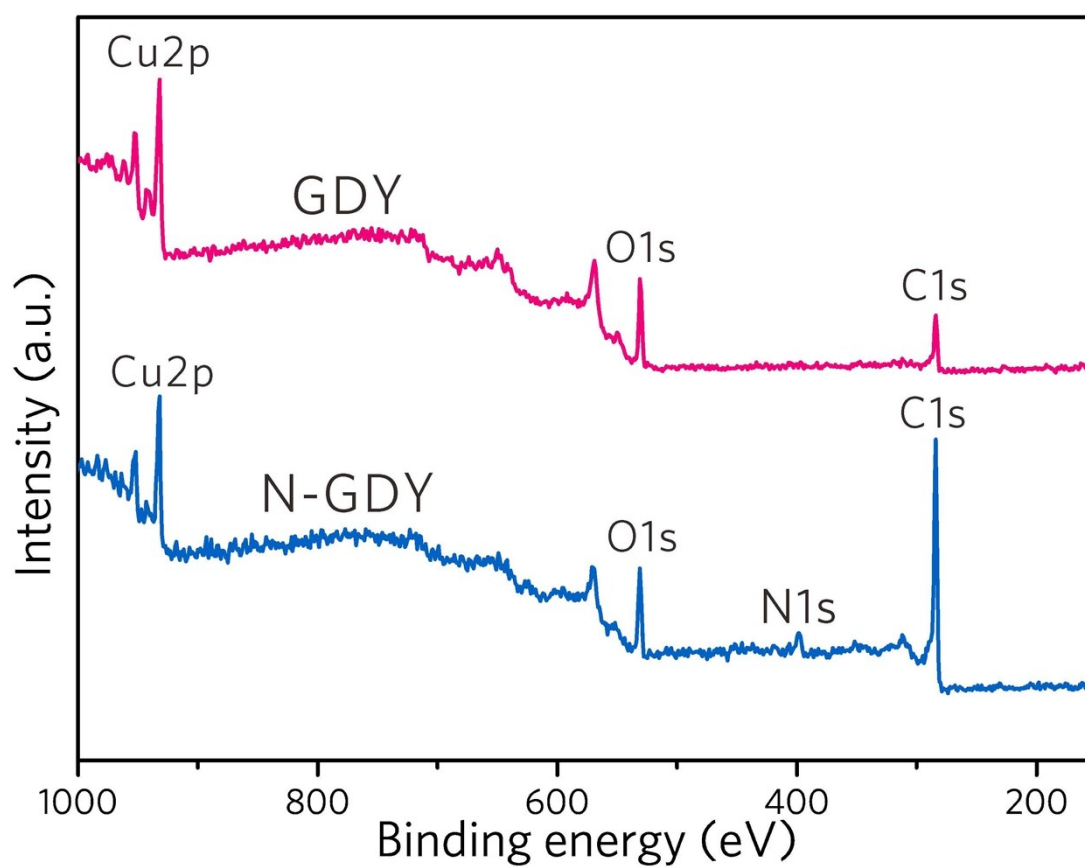

Fig. S8. Full-scan XPS spectra of GDY and N-GDY hosts displaying C, O and N signals.

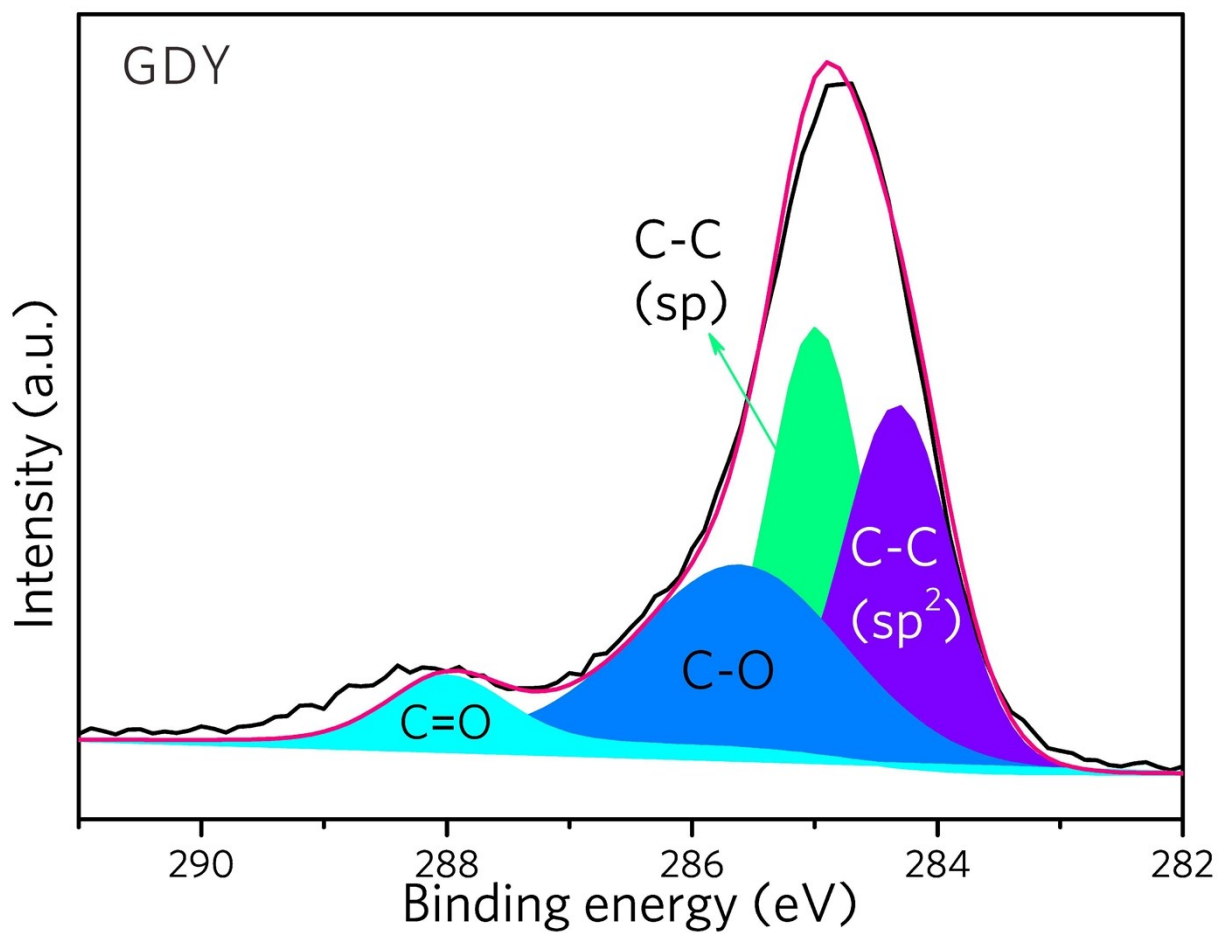

**Fig. S9.** High-resolution  $C\ 1s$  spectrum of the GDY foam.

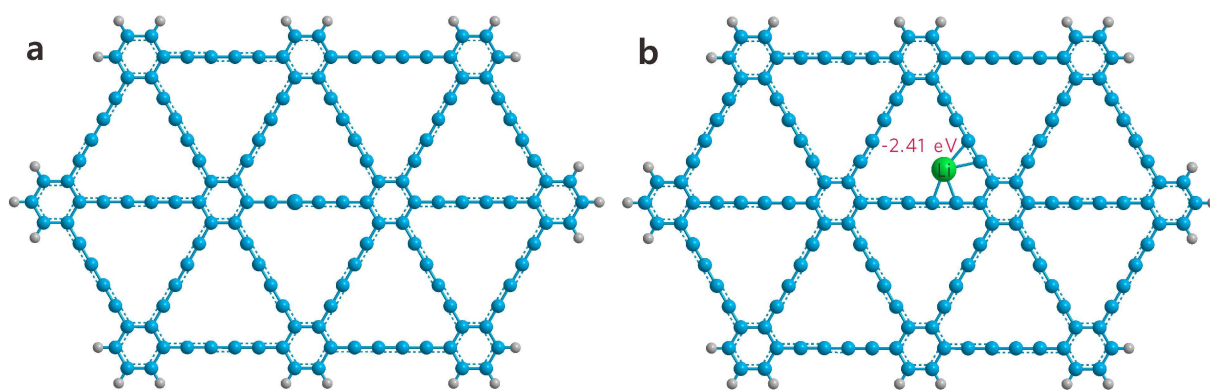

**Fig. S10.** Optimized models of the Li atom binding to non-doped graphdiyne.



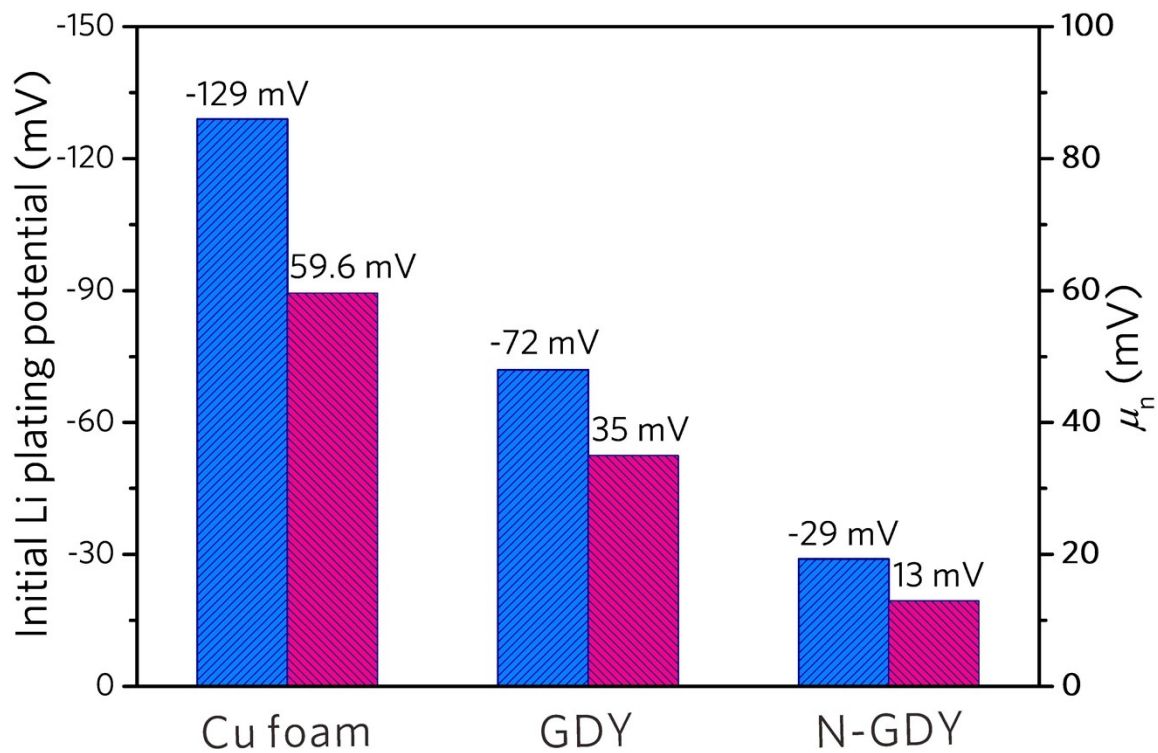

**Fig. S11.** The initial nucleation potentials and nucleation overpotentials ( $\mu_n$ ) of the Cu foam, Cu@DGY and N-DGY electrodes.

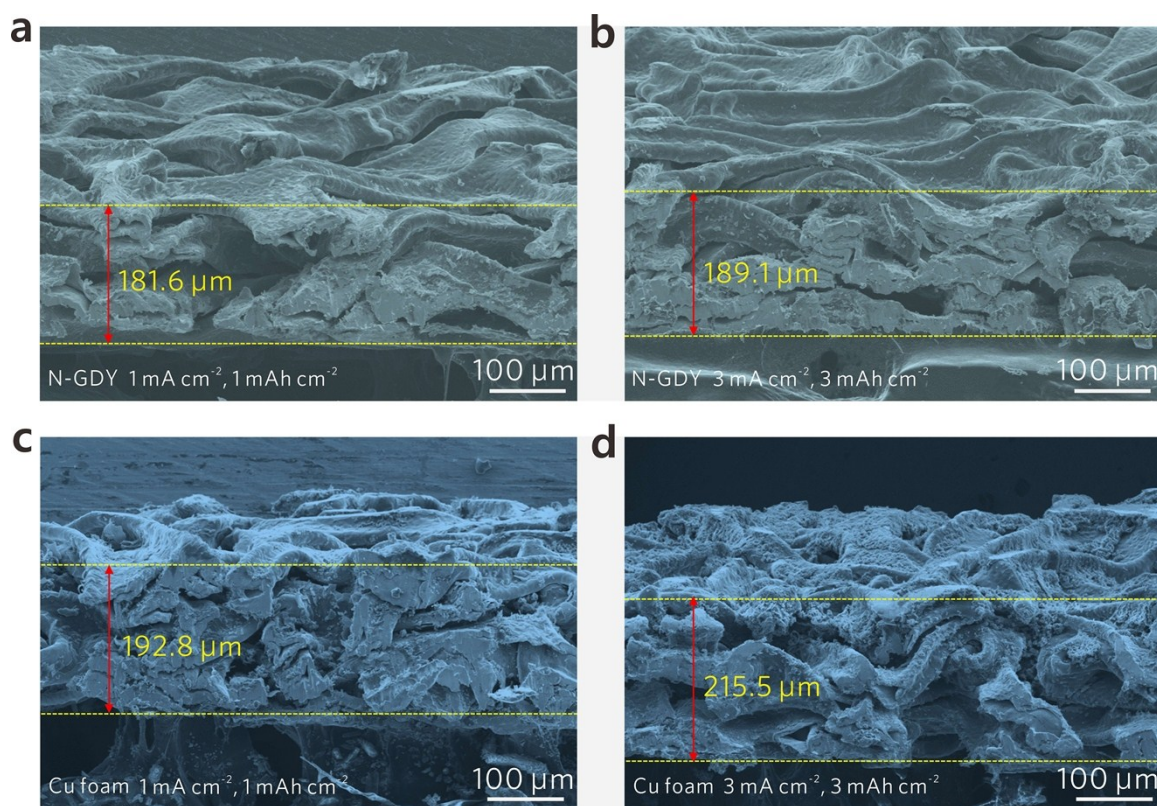

**Fig. S12.** Cross-section SEM images of a, b) the N-GDY and c, d) Cu foam substrates after depositing Li under two different conditions of 1 mAh·cm<sup>-2</sup>/1 mA·cm<sup>-2</sup> and 3 mAh·cm<sup>-2</sup>/3 mA·cm<sup>-2</sup> at the same 20<sup>th</sup> cycle.

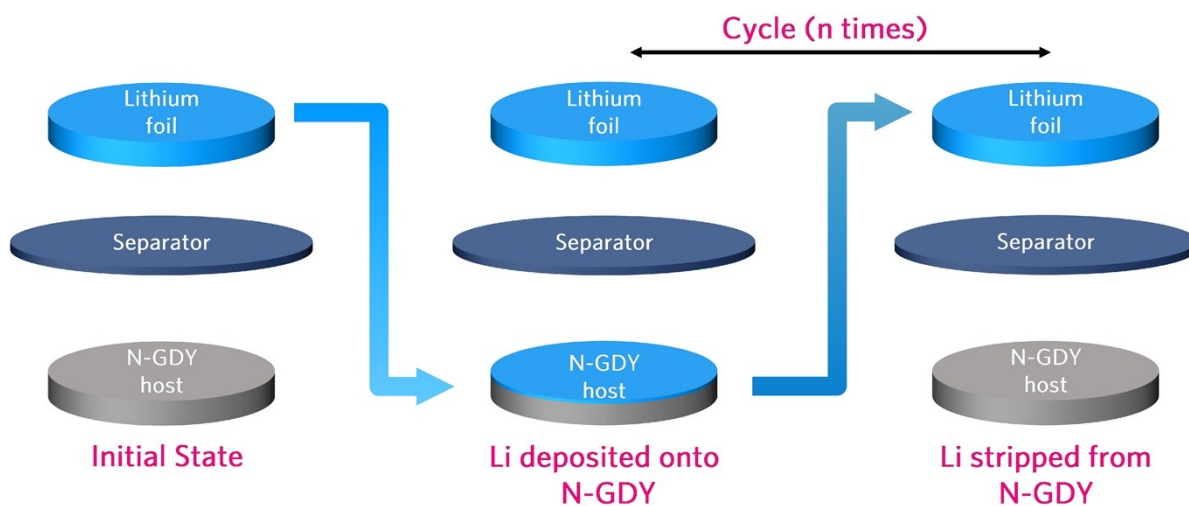

**Fig. S13.** Schematic diagram of cycling half cells for measurement of the Li plating/ stripping Coulombic efficiency during long-term cycling.

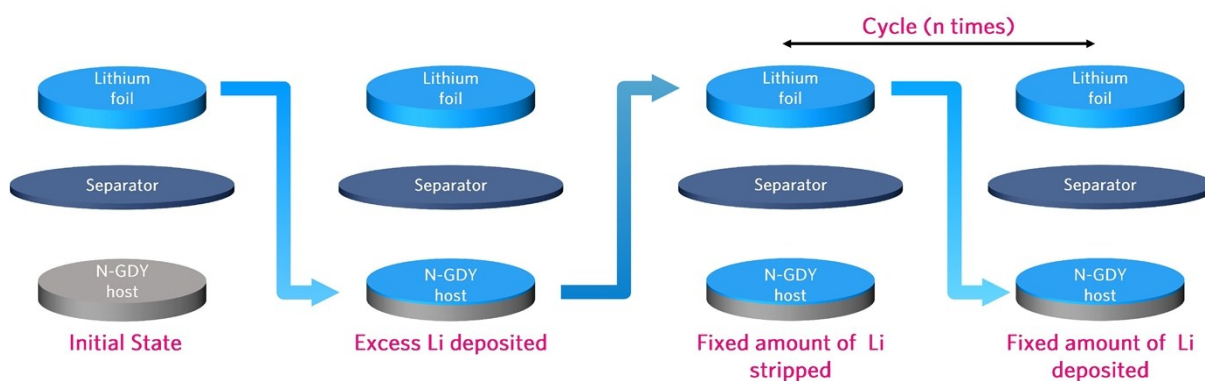

**Fig. S14.** Schematic diagram of cycling symmetric cells for measurement of the cycling stability and voltage hysteresis during long-term cycling.

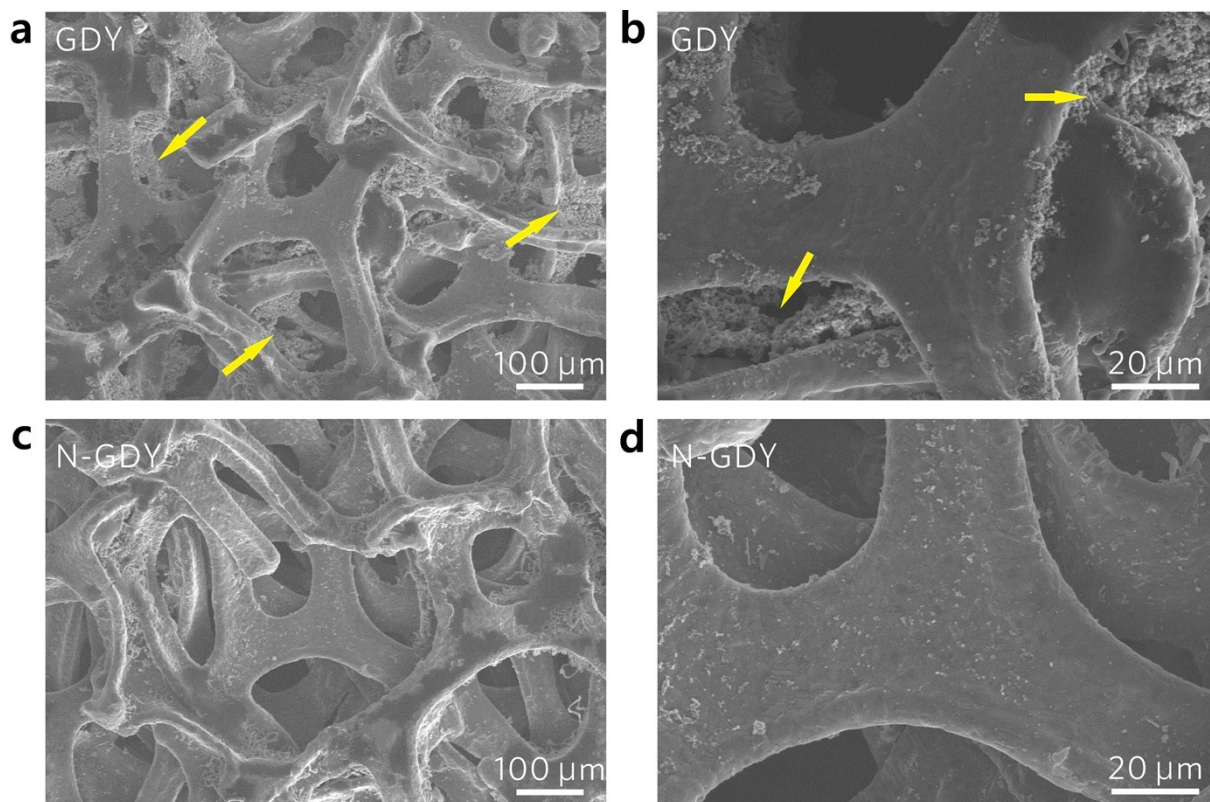

**Fig. S15.** SEM images of the GDY@Li and N-GDY@Li electrodes after the 25<sup>th</sup> Li stripping/plating ( $3 \text{ mA}\cdot\text{cm}^{-2}$  and  $3 \text{ mAh}\cdot\text{cm}^{-2}$ ) in their charged states with a residue of  $2 \text{ mAh}\cdot\text{cm}^{-2}$  Li.

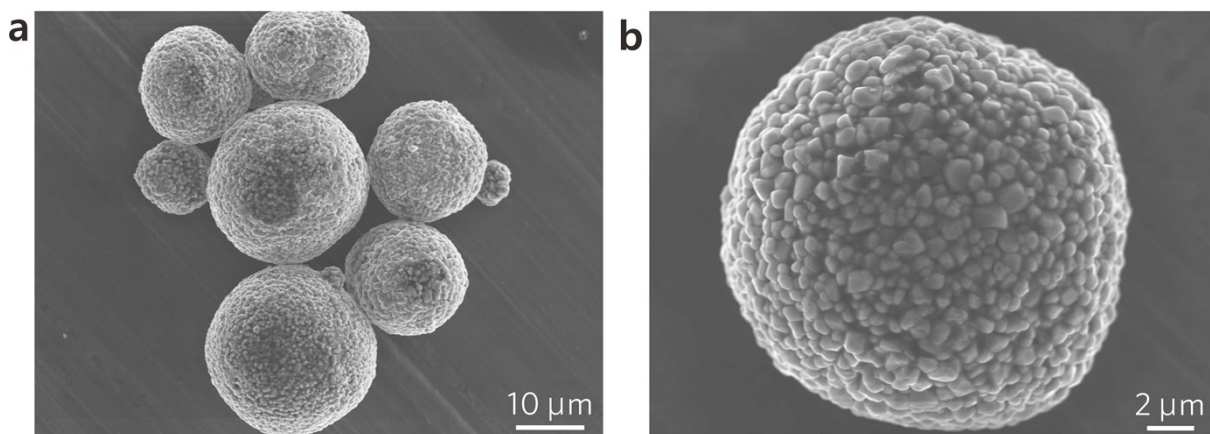

**Fig. S16.** SEM images of the commercial NCM powders at different magnifications.

## ➤ Supporting Information Tables

**Table S1.** The calculated binding energies of Li atom with Cu, VG, un-doped GDY and different functional groups in N-GDY.

|                 | $E(\text{surface}+n*\text{Li})$ | $E(\text{surface})$ | $E(\text{Li})$ | $\Delta E(\text{ads})$ |
|-----------------|---------------------------------|---------------------|----------------|------------------------|
| Cu              | -128.03115268                   | -125.56868228       | -0.07691098    | -2.38556               |
| VG              | -664.90602816                   | -661.65694673       | -0.07691098    | -3.1721705             |
| GDY             | -1245.5995159                   | -1243.1136841       | -0.07691098    | -2.4089208             |
| N( $\alpha$ )   | -1244.7034133                   | -1242.1785241       | -0.07691098    | -2.4479782             |
| N( $\beta$ )    | -1244.2592898                   | -1241.8330269       | -0.07691098    | -2.3493519             |
| N( $\gamma$ )   | -1244.3618429                   | -1241.1065557       | -0.07691098    | -3.1783762             |
| N( $\delta$ )   | -1243.2989976                   | -1239.6315907       | -0.07691098    | -3.5904959             |
| N( $\epsilon$ ) | -1239.9926123                   | -1238.3202938       | -0.07691098    | -1.5954075             |

**Table S2.** Comparison of the electrochemical performances between the N-GDY hybrid host and other porous Cu and carbon allotropes hosts previously reported.

| 3D porous matrix host          | Current density (mA·cm <sup>-2</sup> ) | Cycling capacity (mAh·cm <sup>-2</sup> ) | Stable cycling numbers | Ref.      |
|--------------------------------|----------------------------------------|------------------------------------------|------------------------|-----------|
| N-GDY host                     | 1                                      | 1                                        | >720                   | This work |
|                                | 5                                      | 1                                        | >260                   |           |
|                                | 1                                      | 5                                        | >30                    |           |
|                                | 3                                      | 3                                        | >175                   |           |
| 3D Porous Cu                   | 1                                      | 1                                        | ~300                   | 1         |
| 3D Cu                          | 0.2                                    | 0.5                                      | >120                   | 2         |
| 3D hollow tubular carbon fiber | 1                                      | 2                                        | >60                    | 3         |
| 3D porous Ni core-shell        | 3                                      | 1                                        | >315                   | 4         |
| Hollow carbon nanospheres      | 1                                      | 1                                        | >75                    | 5         |
| 3DNG                           | 0.5                                    | 1                                        | ~150                   | 6         |

|                                 |   |     |      |    |
|---------------------------------|---|-----|------|----|
| Graphitized carbon fibers       | 1 | 1   | >500 | 7  |
| Nitrogen-doped graphene         | 1 | 1   | >727 | 8  |
| G-C <sub>3</sub> N <sub>4</sub> | 1 | 1   | >450 | 9  |
| Unstacked graphene drum         | 2 | 0.1 | >800 | 10 |
| Cu@VG foam                      | 1 | 1   | >160 | 11 |
|                                 | 3 | 3   | >50  |    |

### Reference for Table S2

- [1] Q. Li, S. Zhu and Y. Lu, *Adv. Funct. Mater.*, 2017, **27**, 1606422.
- [2] C. P. Yang, Y. X. Yin, S. F. Zhang, N. W. Li and Y. G. Guo, *Nat. Commun.*, 2015, **6**, 8058.
- [3] L. Liu, Y. X. Yin, J. Y. Li, N. W. Li, X. X. Zeng, H. Ye, Y. G. Guo and L. J. Wan, *Joule*, 2017, **1**, 563-575.
- [4] L. L. Lu, Y. Zhang, Z. Pan, H. B. Yao, F. Zhou and S. H. Yu, *Energy Storage Mater.*, 2017, **9**, 31-38.
- [5] G. Zheng, S. W. Lee, Z. Liang, H. W. Lee, K. Yan, H. Yao, H. Wang, W. Li, S. Chu and Y. Cui, *Nat. Nanotechnol.*, 2014, **9**, 618-623.
- [6] R. Zhang, S. Wen, N. Wang, K. Qin, E. Liu, C. Shi and N. Zhao, *Adv. Energy Mater.*, 2018, **8**, 1800914.
- [7] T. T. Zuo, X. W. Wu, C. P. Yang, Y.X. Yin, H. Ye, N. W. Li and Y. G. Guo, *Adv. Mater.*, 2017, **29**, 1700389.
- [8] G. Huang, J. Han, F. Zhang, Z. Wang, H. Kashani, K. Watanabe and M. Chen, *Adv. Mater.*, 2019, **31**, 1805334.
- [9] Z. Lu, Q. Liang, B. Wang, Y. Tao, Y. Zhao, W. Lv, D. Liu, C. Zhang, Z. Weng, J. Liang, H. Li and Q. H. Yang, *Adv. Energy Mater.*, 2019, **9**, 1803186.
- [10] R. Zhang, X. B. Cheng, C. Z. Zhao, H. J. Peng, J. L. Shi, J. Q. Huang, J. Wang, F. Wei and Q. Zhang, *Adv. Mater.*, 2016, **28**, 2155-2162.
- [11] Z. Hu, Z. Li, Z. Xia, T. Jiang, G. Wang, J. Sun, P. Sun, C. Yan and L. Zhang, *Energy Storage Mater.*, 2019, <https://doi.org/10.1016/j.ensm.2018.12.020>.
